# Supplementary material for: Which Definition of Rurality Should I Use? The Relative Performance of 8 Federal Rural Definitions in Identifying Rural-Urban Disparities
Source: PubMed Central journal article supplement — Med Care. 2021 Sep 9;59(10 Suppl 5):S413–9. doi: 10.1097/MLR.0000000000001612 (PMC8428861; doi:10.1097/mlr.0000000000001612), 2021-09-09
Supplement: mlr-59-s413-s002.pdf [file mlr-59-s413-s002.pdf]

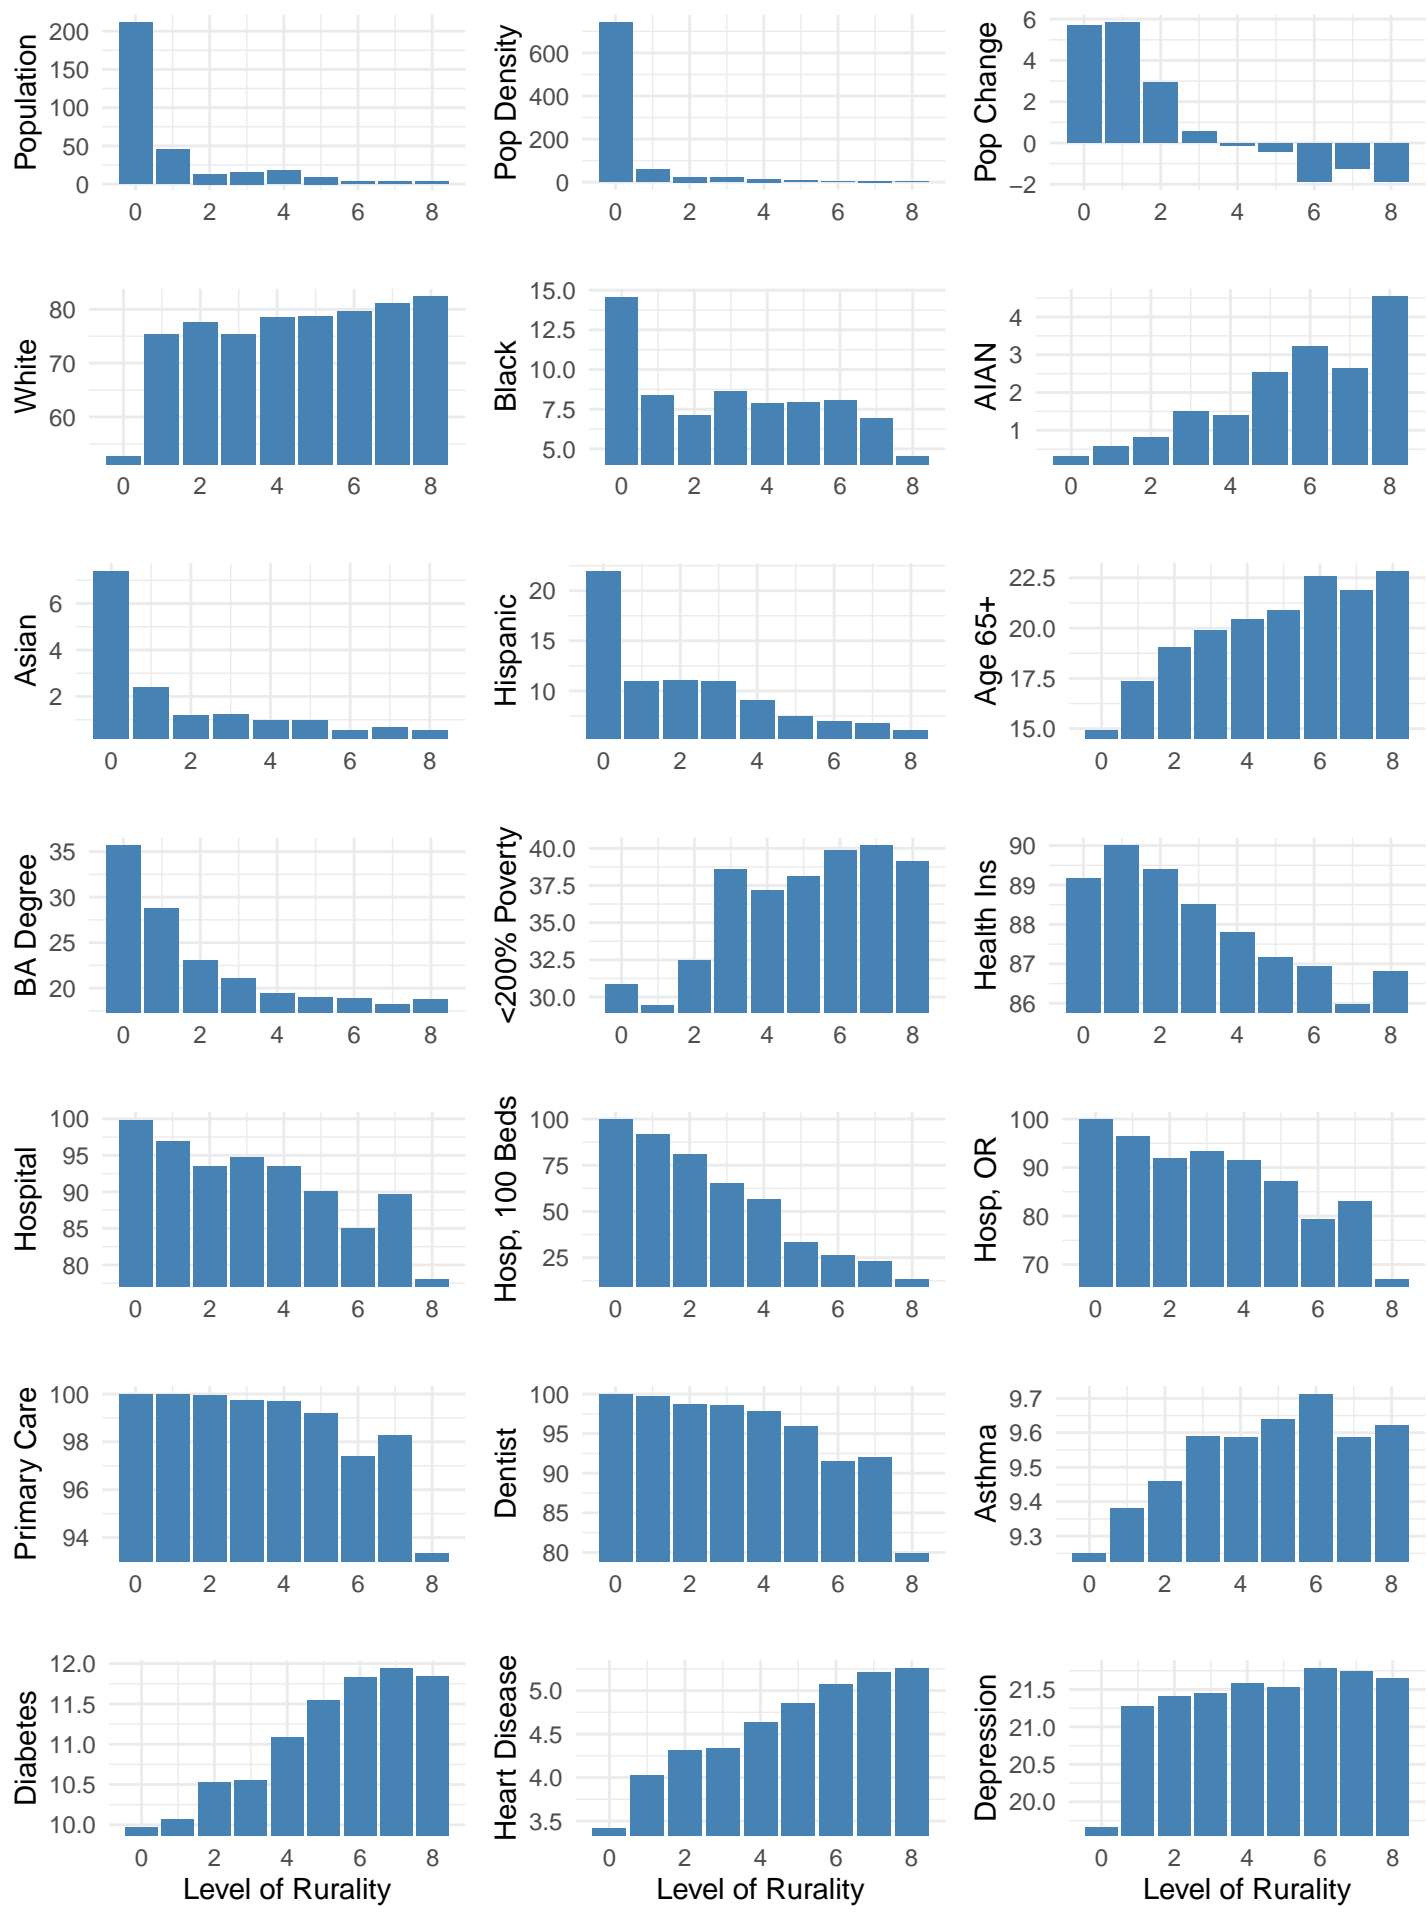

**Supplemental Digital Content File 2 (Figure) – Population characteristics by level of rurality, all characteristics.** Population is total population (millions of people); Pop Density is population density (people per km<sup>2</sup>); Pop Change is change in total population from 2010 to 2018 (%); White, Black, AIAN (American Indian and Alaska Native), Asian, and Hispanic are percent of the population (%); BA Degree is the age  $\pm$ 25 population with a bachelor's degree (%); <200% poverty is the population living in households with incomes less than 200% of the federal poverty level; Health Ins is the percentage of population age <65 with health insurance; Hospital and Primary Care are people with 30 minute travel time access to an acute care hospital (%); Hosp, 100 Beds is access to a hospital with at least 100 beds (%); Hosp, OR is access to a hospital with an operating room (%); Primary Care and Dentists are access to a primary care physician and dentist respectively (%); and Asthma, Diabetes, Heart Disease, and Depression are prevalence in the age  $\pm$ 18 population (%).
